# Supplementary material for: Earnings Conference Calls and the SEC Comment Letter Process
Source: Atypon-hosted journal article supplement (doi:10.1287/mnsc.2023.02065), 2026-01-30
Supplement: mnsc.2023.02065.sm1.pdf [file mnsc.2023.02065.sm1.pdf]

## Online Appendix for “Earnings Conference Calls and the SEC Comment Letter Process”

Alina Lerman  
*University of Connecticut*  
[alina.lerman@uconn.edu](mailto:alina.lerman@uconn.edu)

Thomas D. Steffen  
*Yale University*  
[thomas.steffen@yale.edu](mailto:thomas.steffen@yale.edu)

Kangkang Zhang  
*University of Illinois Urbana-Champaign*  
[kkzhang@illinois.edu](mailto:kkzhang@illinois.edu)

This Online Appendix includes supplemental analyses for the paper “Earnings Conference Calls and the SEC Comment Letter Process.”

Table OA1: Variables not Defined in Appendix A (*in alphabetical order*)

Table OA2: Descriptive Characteristics of CCCLs (letter level)

Table OA3: Descriptive Characteristics of CCCL Comments (comment level)

Table OA4: Descriptive Characteristics of Calls Referenced in CCCLs (call level)

Table OA5: Determinants of Receiving a CCCL: Shapley Values across CCCL Types

Table OA6: *CCCL* Coefficients for the Remediation and Quality Analyses across CCCL Types (same firm letter-level)

Table OA7: Full Tabulation of Table 5 Panel B: Quality of SEC Filing Reviews for Pooled Sample Letter-level Comparison

Table OA8: Full Tabulation of Table 5 Panel C: Quality of SEC Filing Reviews for Same Firm Letter-level Comparison

Table OA9: Full Tabulation of Table 6 Panel B: Costs of Remediation for Pooled Sample Letter-level Comparison

Table OA10: Full Tabulation of Table 6 Panel C: Costs of Remediation for Same Firm Letter-level Comparison

**Table OA1: Variables not Defined in Appendix A (in alphabetical order)**

| <b>Variable</b>          | <b>Definition</b>                                                                                                                                           |
|--------------------------|-------------------------------------------------------------------------------------------------------------------------------------------------------------|
| <i>CommentNo.</i>        | The order number of the conference call-related comment as presented in the SEC comment letter.                                                             |
| <i>CallInCorresp</i>     | An indicator variable that equals 1 if the company directly addresses the referred conference call in the response correspondence, and 0 otherwise.         |
| <i>MentionTranscript</i> | An indicator variable that equals 1 if the conference call-related comment mentions the phrase “transcript”, and 0 otherwise.                               |
| <i>RefersToPrior</i>     | An indicator variable that equals 1 if the conference call-related comment refers to a prior SEC comment letter or company correspondence, and 0 otherwise. |
| <i>TotalComments</i>     | The number of total comments included in the SEC comment letter.                                                                                            |

**Table OA2: Descriptive Characteristics of CCCLs (letter level)**

***Panel A: Distribution of CCCLs and Non-CCCLs by SEC Office / Industry Group***

| <i>SEC Office / Industry Group</i> | <i>CCCLs</i> | <i>Percent</i> | <i>Non-CCCLs</i> | <i>Percent</i> | <i>CCCLs as<br/>Percent of Total</i> |
|------------------------------------|--------------|----------------|------------------|----------------|--------------------------------------|
| (1) Health and Insurance           | 45           | 5.6%           | 1,400            | 10.8%          | 3.1%                                 |
| (2) Consumer Products              | 52           | 6.4%           | 1,129            | 8.7%           | 4.4%                                 |
| (3) Information Tech. & Services   | 220          | 27.2%          | 1,431            | 11.0%          | 13.3%                                |
| (4) Natural Resources              | 55           | 6.8%           | 1,076            | 8.3%           | 4.9%                                 |
| (5) Transportation and Leisure     | 33           | 4.1%           | 1,381            | 10.6%          | 2.3%                                 |
| (6) Manufacturing and Construction | 139          | 17.2%          | 1,587            | 12.2%          | 8.1%                                 |
| (7) Financial Services             | 48           | 5.9%           | 829              | 6.4%           | 5.5%                                 |
| (8) Real Estate and Commodities    | 12           | 1.5%           | 1,150            | 8.9%           | 1.0%                                 |
| (9) Beverages, Apparel, and Mining | 67           | 8.3%           | 610              | 4.7%           | 9.9%                                 |
| (10) Electronics and Machinery     | 78           | 9.6%           | 1,473            | 11.3%          | 5.0%                                 |
| (11) Telecommunications            | 60           | 7.4%           | 933              | 7.2%           | 6.0%                                 |
| <b>Total</b>                       | <b>809</b>   | <b>100%</b>    | <b>12,999</b>    | <b>100%</b>    | <b>5.9%</b>                          |

***Panel B: Descriptive Statistics for CCCL Characteristics***

|                          | <i>N</i> | <i>Mean</i> | <i>Std</i> | <i>P25</i> | <i>Median</i> | <i>P75</i> |
|--------------------------|----------|-------------|------------|------------|---------------|------------|
| <i>CommentNo.</i>        | 809      | 2.918       | 3.148      | 1.000      | 2.000         | 3.000      |
| <i>TotalComments</i>     | 809      | 6.162       | 4.925      | 3.000      | 5.000         | 8.000      |
| <i>RefersToPrior</i>     | 809      | 0.082       | 0.279      | 0.000      | 0.000         | 0.000      |
| <i>MentionTranscript</i> | 809      | 0.133       | 0.340      | 0.000      | 0.000         | 0.000      |
| <i>CallInCorresp</i>     | 809      | 0.393       | 0.489      | 0.000      | 0.000         | 1.000      |

*Notes:* This table provides sample distribution statistics of comment letters with at least one comment referring to the company's earnings conference call(s) (CCCLs). Panel A shows the distribution of CCCLs and non-CCCLs by industry, where industry is identified based on the assigned office of the SEC Division of Corporation Finance. Panel B tabulates descriptive statistics of other variables that we manually collected for CCCLs. All variables in Panel B are defined in Table OA1.

**Table OA3: Descriptive Characteristics of CCCL Comments (comment level)**

**Panel A: Distribution of CCCL Comment-level Issue Types by Comment-level Category**

| <i>Issue type</i>                                                                                   | <i>Comment Categories</i>                              |                                                                     |                                                                       |                                                                                |                                                                     |
|-----------------------------------------------------------------------------------------------------|--------------------------------------------------------|---------------------------------------------------------------------|-----------------------------------------------------------------------|--------------------------------------------------------------------------------|---------------------------------------------------------------------|
|                                                                                                     | <i>1<br/>Insufficient<br/>disclosure in<br/>filing</i> | <i>2a<br/>Incorrect/<br/>inconsistent<br/>information<br/>given</i> | <i>2b<br/>Incorrect/<br/>inconsistent<br/>disclosure<br/>practice</i> | <i>3<br/>Insufficient/<br/>incorrect/<br/>inconsistent<br/>call disclosure</i> | <i>4<br/>Incorrect/<br/>insufficient<br/>disclosure in<br/>both</i> |
|                                                                                                     | <i>Comments</i>                                        | <i>Comments</i>                                                     | <i>Comments</i>                                                       | <i>Comments</i>                                                                | <i>Comments</i>                                                     |
| Revenue (including recognition, composition, etc.)                                                  | 132                                                    | 11                                                                  | 5                                                                     | 3                                                                              | 1                                                                   |
| Segment Reporting (including geographic segments, disaggregation by portfolios/products/categories) | 85                                                     | 28                                                                  | 32                                                                    | 1                                                                              | 2                                                                   |
| Non-GAAP or KPI                                                                                     | 89                                                     | 3                                                                   | 11                                                                    | 15                                                                             | 13                                                                  |
| MD&A (General Issues or Risk Factors)                                                               | 103                                                    | 4                                                                   | 2                                                                     | 0                                                                              | 1                                                                   |
| MD&A (Customers/Markets/Seasonality)                                                                | 90                                                     | 5                                                                   | 0                                                                     | 0                                                                              | 0                                                                   |
| Current Assets (Cash, Inventory, Receivables, etc.)                                                 | 31                                                     | 5                                                                   | 0                                                                     | 5                                                                              | 1                                                                   |
| Legal Matters (including Contingencies, government/regulatory issues)                               | 34                                                     | 3                                                                   | 0                                                                     | 0                                                                              | 1                                                                   |
| Long-Term Productive Assets (Tangible)                                                              | 30                                                     | 3                                                                   | 1                                                                     | 1                                                                              | 1                                                                   |
| Operating Expenses (R&D, SG&A, warranty expense, etc.)                                              | 19                                                     | 2                                                                   | 0                                                                     | 1                                                                              | 0                                                                   |
| M&A (including divestitures)                                                                        | 18                                                     | 4                                                                   | 0                                                                     | 0                                                                              | 0                                                                   |
| Cost of Goods Sold                                                                                  | 18                                                     | 2                                                                   | 0                                                                     | 1                                                                              | 0                                                                   |
| MD&A (Products)                                                                                     | 19                                                     | 0                                                                   | 0                                                                     | 1                                                                              | 0                                                                   |
| Foreign                                                                                             | 11                                                     | 5                                                                   | 0                                                                     | 0                                                                              | 1                                                                   |
| Long-Term Productive Assets (Goodwill)                                                              | 13                                                     | 3                                                                   | 0                                                                     | 0                                                                              | 0                                                                   |
| Other Expenses                                                                                      | 12                                                     | 1                                                                   | 0                                                                     | 0                                                                              | 0                                                                   |
| Long-Term Productive Assets (Intangible, except Goodwill)                                           | 11                                                     | 2                                                                   | 0                                                                     | 0                                                                              | 0                                                                   |
| State Sponsors of Terrorism                                                                         | 11                                                     | 1                                                                   | 0                                                                     | 0                                                                              | 0                                                                   |
| Taxes                                                                                               | 8                                                      | 1                                                                   | 0                                                                     | 1                                                                              | 1                                                                   |
| Investments - Passive (equity, debt, derivatives, hedging)                                          | 10                                                     | 1                                                                   | 0                                                                     | 0                                                                              | 0                                                                   |
| Long-Term Liabilities – Other (pension, leases, etc.)                                               | 8                                                      | 2                                                                   | 0                                                                     | 0                                                                              | 0                                                                   |
| Equity Issues (Issuance, buyback, split, etc.)                                                      | 6                                                      | 1                                                                   | 0                                                                     | 0                                                                              | 0                                                                   |

|                                                     |            |           |           |           |           |
|-----------------------------------------------------|------------|-----------|-----------|-----------|-----------|
| Long-Term Liabilities – Debt                        | 4          | 2         | 0         | 0         | 0         |
| Governance and Internal Control                     | 5          | 1         | 0         | 0         | 0         |
| Employee and Compensation                           | 3          | 2         | 0         | 0         | 0         |
| Statement of Cash Flows                             | 2          | 0         | 0         | 0         | 0         |
| Current Liabilities                                 | 1          | 0         | 0         | 0         | 0         |
| Investments – Active (equity method, consolidation) | 1          | 0         | 0         | 0         | 0         |
| <b>Total</b>                                        | <b>774</b> | <b>92</b> | <b>51</b> | <b>29</b> | <b>22</b> |

**Table OA3, continued: Descriptive Characteristics of CCCL Comments (comment level)**

***Panel B: Distribution of CCCL Comment-level Categories by Firm Response of Agreement vs. Refusal***

|                                                         | <i>Comments</i> | <i>Percent</i> |
|---------------------------------------------------------|-----------------|----------------|
| <i>Agreement (N = 466):</i>                             |                 |                |
| 1 - Insufficient disclosure in filing                   | 391             | 40.4%          |
| 2a - Incorrect/inconsistent information given           | 28              | 2.9%           |
| 2b - Incorrect/inconsistent disclosure practice         | 26              | 2.7%           |
| 3 - Insufficient/incorrect/inconsistent call disclosure | 12              | 1.2%           |
| 4 - Incorrect/insufficient disclosure in both           | 9               | 0.9%           |
| <i>Refusal (N = 257):</i>                               |                 |                |
| 1 - Insufficient disclosure in filing                   | 208             | 21.5%          |
| 2a - Incorrect/inconsistent information given           | 24              | 2.5%           |
| 2b - Incorrect/inconsistent disclosure practice         | 15              | 1.5%           |
| 3 - Insufficient/incorrect/inconsistent call disclosure | 5               | 0.5%           |
| 4 - Incorrect/insufficient disclosure in both           | 5               | 0.5%           |
| <i>Other (N = 245):</i>                                 |                 |                |
| 1 - Insufficient disclosure in filing                   | 175             | 18.1%          |
| 2a - Incorrect/inconsistent information given           | 40              | 4.1%           |
| 2b - Incorrect/inconsistent disclosure practice         | 10              | 1.0%           |
| 3 - Insufficient/incorrect/inconsistent call disclosure | 12              | 1.2%           |
| 4 - Incorrect/insufficient disclosure in both           | 8               | 0.8%           |
| <b>Total</b>                                            | <b>968</b>      | <b>100%</b>    |

**Table OA3, continued: Descriptive Characteristics of CCCL Comments (comment level)**

***Panel C: Distribution of CCCL Comment-level Issue Types by Firm Response of Agreement vs. Refusal***

| <i>Issue type</i>                                                                                   | <i>Firm Agreement/Refusal</i> |                 |                 |
|-----------------------------------------------------------------------------------------------------|-------------------------------|-----------------|-----------------|
|                                                                                                     | <i>Agreement</i>              | <i>Refusal</i>  | <i>Other</i>    |
|                                                                                                     | <i>Comments</i>               | <i>Comments</i> | <i>Comments</i> |
| Revenue (including recognition, composition, etc.)                                                  | 68                            | 45              | 39              |
| Segment Reporting (including geographic segments, disaggregation by portfolios/products/categories) | 48                            | 37              | 63              |
| Non-GAAP or KPI                                                                                     | 71                            | 44              | 16              |
| MD&A (General Issues or Risk Factors)                                                               | 71                            | 31              | 8               |
| MD&A (Customers/Markets/Seasonality)                                                                | 69                            | 20              | 6               |
| Current Assets (Cash, Inventory, Receivables, etc.)                                                 | 20                            | 9               | 13              |
| Legal Matters (including Contingencies, government/regulatory issues)                               | 12                            | 17              | 9               |
| Long-Term Productive Assets (Tangible)                                                              | 12                            | 8               | 16              |
| Operating Expenses (R&D, SG&A, warranty expense, etc.)                                              | 14                            | 5               | 3               |
| M&A (including divestitures)                                                                        | 7                             | 5               | 10              |
| Cost of Goods Sold                                                                                  | 13                            | 6               | 2               |
| MD&A (Products)                                                                                     | 8                             | 11              | 1               |
| Foreign                                                                                             | 6                             | 4               | 7               |
| Long-Term Productive Assets (Goodwill)                                                              | 4                             | 1               | 11              |
| Other Expenses                                                                                      | 8                             | 4               | 1               |
| Long-Term Productive Assets (Intangible, except Goodwill)                                           | 4                             | 1               | 8               |
| State Sponsors of Terrorism                                                                         | 0                             | 0               | 12              |
| Taxes                                                                                               | 4                             | 1               | 6               |
| Investments - Passive (equity, debt, derivatives, hedging)                                          | 8                             | 1               | 2               |
| Long-Term Liabilities – Other (pension, leases, etc.)                                               | 7                             | 2               | 1               |
| Equity Issues (Issuance, buyback, split, etc.)                                                      | 4                             | 1               | 2               |
| Long-Term Liabilities – Debt                                                                        | 5                             | 0               | 1               |
| Governance and Internal Control                                                                     | 1                             | 2               | 3               |
| Employee and Compensation                                                                           | 1                             | 1               | 3               |

|                                                     |     |     |     |
|-----------------------------------------------------|-----|-----|-----|
| Statement of Cash Flows                             | 0   | 1   | 1   |
| Current Liabilities                                 | 1   | 0   | 0   |
| Investments – Active (equity method, consolidation) | 0   | 0   | 1   |
| Total                                               | 466 | 257 | 245 |

**Table OA3, continued: Descriptive Characteristics of CCCL Comments (comment level)**

***Panel D: Firm Responses Referencing Guidance by SEC References to Guidance***

|                                                          | <i>Comments</i> | <i>Percent</i> |
|----------------------------------------------------------|-----------------|----------------|
| <i>SEC Refers to Specific Guidance (N = 547)</i>         |                 |                |
| Firm refers to same guidance as the SEC                  | 273             | 28.2%          |
| Firm refers to new guidance                              | 114             | 11.8%          |
| Firm does not refer to guidance                          | 150             | 15.5%          |
| No response                                              | 10              | 1.0%           |
| <i>SEC Does Not Refer to Specific Guidance (N = 421)</i> |                 |                |
| Firm refers to new guidance                              | 80              | 8.3%           |
| Firm does not refer to guidance                          | 337             | 34.8%          |
| No response                                              | 4               | 0.4%           |
| Total                                                    | 968             | 100.0%         |

***Panel E: Distribution of the Number of SEC Guidance References***

|       | <i>Comments</i> | <i>Percent</i> |
|-------|-----------------|----------------|
| 0     | 421             | 43.5%          |
| 1     | 339             | 35.0%          |
| 2     | 167             | 17.3%          |
| 3     | 33              | 3.4%           |
| 4     | 4               | 0.4%           |
| 5     | 3               | 0.3%           |
| 9     | 1               | 0.1%           |
| Total | 968             | 100%           |

***Panel F: Types of Guidance Referenced by the SEC***

|                     | <i>References</i> | <i>Percent</i> |
|---------------------|-------------------|----------------|
| Regulation S-K      | 272               | 33.5%          |
| SEC Release 33-8350 | 181               | 22.3%          |
| ASC 280             | 66                | 8.1%           |
| Regulation G        | 15                | 1.8%           |
| Regulation S-X      | 11                | 1.4%           |
| Other Guidance      | 267               | 32.9%          |
| Total               | 812               | 100%           |

**Table OA3, continued: Descriptive Characteristics of CCCL Comments (comment level)**

***Panel G: Filing Sections for which Firms Agree to Fully or Partially Change Disclosures after CCCL Comments (509 out of 968 CCCLs)***

|                                                                                               | <i>Observation</i> | <i>Percent</i> |
|-----------------------------------------------------------------------------------------------|--------------------|----------------|
| <i>Full (N = 466) or Partial (N = 43) Agreement to Change SEC Filings or Conference Calls</i> |                    |                |
| MD&A                                                                                          | 183                | 36.0%          |
| Risk factors                                                                                  | 5                  | 1.0%           |
| Segment                                                                                       | 9                  | 1.8%           |
| Non-GAAP                                                                                      | 5                  | 1.0%           |
| Critical accounting policies                                                                  | 7                  | 1.4%           |
| Other                                                                                         | 45                 | 8.8%           |
| Unspecified                                                                                   | 243                | 47.7%          |
| Conference call                                                                               | 12                 | 2.4%           |
| Total                                                                                         | 509                | 100%           |

***Panel H: Firms Providing Detailed Revision Plans/Examples in Response to CCCL Comments where the Response Indicates Full or Partial Agreement to Change SEC Filings (509 out of 968 CCCLs)***

|                                                                                               | <i>Observation</i> | <i>Percent</i> |
|-----------------------------------------------------------------------------------------------|--------------------|----------------|
| <i>Full (N = 466) or Partial (N = 43) Agreement to Change SEC Filings or Conference Calls</i> |                    |                |
| Firm provides detailed revision plan/example                                                  | 230                | 45.2%          |
| Firm does not provide detailed revision plan/example                                          | 279                | 54.8%          |
| Total                                                                                         | 509                | 100%           |

***Panel I: The Number of Tables in Firms' Responses to CCCL Comments where the Response Indicates Full or Partial Agreement to Change SEC Filings (509 out of 968 CCCLs)***

|                                                                                               | <i>Comments</i> | <i>Percent</i> |
|-----------------------------------------------------------------------------------------------|-----------------|----------------|
| <i>Full (N = 466) or Partial (N = 43) Agreement to Change SEC Filings or Conference Calls</i> |                 |                |
| 0                                                                                             | 414             | 81.3%          |
| 1                                                                                             | 66              | 13.0%          |
| 2                                                                                             | 21              | 4.1%           |
| 3                                                                                             | 3               | 0.6%           |
| 4                                                                                             | 1               | 0.2%           |
| 5                                                                                             | 2               | 0.4%           |
| 7                                                                                             | 2               | 0.4%           |
| Total                                                                                         | 509             | 100%           |

***Panel J: CCCL Comments Receiving Subsequent Follow-up by the SEC***

|                                                     | <i>Comments</i> | <i>Percent</i> |
|-----------------------------------------------------|-----------------|----------------|
| Yes                                                 | 186             | 19.2%          |
| In the <i>Agreement</i> ( <i>N</i> = 466) subsample | 48              |                |
| In the <i>Refusal</i> ( <i>N</i> = 257) subsample   | 71              |                |
| In the <i>Other</i> ( <i>N</i> = 245) subsample     | 67              |                |
| No                                                  | 768             | 79.3%          |
| Missing response letter                             | 14              | 1.5%           |
| Total                                               | 968             | 100%           |

*Notes:* This table provides additional statistics describing the nature of comments referring to the company's earnings conference call(s). Panel A presents the distribution of our manually classified issue types by our manually classified comment categories. Definitions of comment categories and examples of comments are provided in Appendix B. Panel B displays the distribution of comment categories by our manually classified firm responses to requests for future filing or call changes. Panel C shows the distribution of issue types by our manually classified firm responses to requests for future filing or call changes. Panel D reports the distribution of whether the SEC refers to guidance in the question and whether the firm refers to the same, new, or no guidance in the response letter. Panel E shows the distribution of the number of guidance items referenced by the SEC. Panel F shows the types of guidance referenced by the SEC (the total observations in Panel F differs from the other panels because it focuses on individual guidance references across the CCCLs with at least one guidance reference). Panel G provides the distribution of which sections of SEC filings firms agree to change upon receiving requests from the SEC. Panel H reports the distribution of whether the firm provides detailed revision plans or examples in its response letter. Panel I depicts the distribution of the number of tables that the firm includes in its response letter. Panel J presents the distribution of whether the SEC issues additional comment letters following up on the firm's response.

**Table OA4: Descriptive Characteristics of Calls Referenced in CCCLs (call level)**

***Panel A: Distribution of Conference Call Segments Referenced in CCCLs***

| <i>Call Segment</i> | <i>Observation</i> | <i>Percent</i> |
|---------------------|--------------------|----------------|
| Body                | 634                | 58.3%          |
| Both body and Q&A   | 225                | 20.7%          |
| Q&A                 | 224                | 20.6%          |
| Unable to identify  | 5                  | 0.5%           |
| Total               | 1,088              | 100%           |

***Panel B: Distribution of Conference Call Speakers Referenced in CCCLs***

| <i>Speaker</i>                   | <i>Observation</i> | <i>Percent</i> |
|----------------------------------|--------------------|----------------|
| CEO (Chief Executive Office)     | 472                | 43.4%          |
| CFO (Chief Financial Officer)    | 319                | 29.3%          |
| CEO and CFO                      | 160                | 14.7%          |
| COO (Chief Operating Officer)    | 19                 | 1.7%           |
| President                        | 17                 | 1.6%           |
| VP (Vice President)              | 10                 | 0.9%           |
| IRO (Investor Relations Officer) | 9                  | 0.8%           |
| CEO and COO                      | 7                  | 0.6%           |
| Other <sup>+</sup>               | 70                 | 6.4%           |
| Unable to identify               | 5                  | 0.5%           |
| Total                            | 1,088              | 100%           |

<sup>+</sup> Examples of other speakers include EVP (Executive Vice President), SVP (Senior Vice President), Chairman, CRO (Chief Risk Officer), CAO (Chief Accounting Officer), CMO (Chief Marketing Officer), and CSO (Chief Strategy Officer).

***Panel C: Conference Call Direct Quotations Referenced in CCCLs***

| <i>Direct Quotation</i> | <i>Observation</i> | <i>Percent</i> |
|-------------------------|--------------------|----------------|
| Yes                     | 870                | 80.0%          |
| No                      | 218                | 20.0%          |
| Total                   | 1,088              | 100%           |

*Notes:* This table provides descriptive information about the nature of the conference calls mentioned by the SEC staff in our sample of CCCLs. Panel A reports the distribution of the portion of call where the referenced information appears. Panel B displays the distribution of the speakers of the referenced information. Panel C presents the distribution of whether the SEC directly quotes the information in the referenced conference call.

**Table OA5: Determinants of Receiving a CCCL: Shapley Values across CCCL Types**

**Panel A: Comment Categories, Issue Types, and Firm Agreement to Change Disclosures**

| Determinants Category                 | By Comment Category |          |            |              | By Issue Type  |                 |                |            | By Agreement |               |
|---------------------------------------|---------------------|----------|------------|--------------|----------------|-----------------|----------------|------------|--------------|---------------|
|                                       | (1)<br>Full         | (2)<br>1 | (3)<br>3/4 | (4)<br>2a/2b | (5)<br>Revenue | (6)<br>Non-GAAP | (7)<br>Segment | (8)<br>MDA | (9)<br>Agree | (10)<br>Other |
| <i>Firm Complexity and Visibility</i> | 5.85%               | 4.59%    | 11.49%     | 6.60%        | 21.21%         | 8.26%           | 9.27%          | 4.12%      | 4.66%        | 8.45%         |
| <i>Firm Information Environment</i>   | 4.81%               | 5.70%    | 7.10%      | -0.09%       | 5.46%          | 8.15%           | 7.46%          | 2.80%      | 5.08%        | 3.98%         |
| <i>SEC Scrutiny</i>                   | 0.75%               | -0.21%   | 17.61%     | 3.59%        | -1.66%         | 0.13%           | 9.25%          | 0.76%      | 2.01%        | -0.47%        |
| <i>SEC Filing Review Process</i>      | 31.39%              | 31.86%   | 31.08%     | 29.61%       | 17.74%         | 14.88%          | 20.62%         | 46.17%     | 37.77%       | 25.16%        |
| <i>Year-Qtr FE</i>                    | 33.61%              | 31.85%   | 19.44%     | 45.43%       | 39.11%         | 14.04%          | 35.49%         | 14.91%     | 26.79%       | 35.28%        |
| <i>Industry FE</i>                    | 23.60%              | 26.21%   | 13.28%     | 14.86%       | 18.13%         | 54.54%          | 17.91%         | 31.24%     | 23.68%       | 27.61%        |
| No. of CCCLs                          | 809                 | 623      | 41         | 112          | 114            | 104             | 126            | 174        | 380          | 377           |
| No. of Observations                   | 13,808              | 13,775   | 13,775     | 13,775       | 13,767         | 13,767          | 13,767         | 13,767     | 13,756       | 13,756        |
| Adjusted $R^2$                        | 0.067               | 0.056    | 0.005      | 0.005        | 0.012          | 0.021           | 0.012          | 0.018      | 0.032        | 0.032         |

**Panel B: Conference Call Speakers and Segments**

| Determinants Category                 | (1)<br>Full | By Speaker          |               | By Segment      |             |
|---------------------------------------|-------------|---------------------|---------------|-----------------|-------------|
|                                       |             | (2)<br>Includes CFO | (3)<br>No CFO | (4)<br>Q&A/Both | (5)<br>Body |
| <i>Firm Complexity and Visibility</i> | 5.85%       | 8.12%               | 4.17%         | 6.42%           | 4.16%       |
| <i>Firm Information Environment</i>   | 4.81%       | 4.96%               | 6.28%         | 10.08%          | 8.14%       |
| <i>SEC Scrutiny</i>                   | 0.75%       | 1.83%               | -0.42%        | -0.80%          | 1.68%       |
| <i>SEC Filing Review Process</i>      | 31.39%      | 26.58%              | 35.99%        | 31.27%          | 30.58%      |
| <i>Year-Qtr FE</i>                    | 33.61%      | 30.27%              | 30.88%        | 32.13%          | 32.61%      |
| <i>Industry FE</i>                    | 23.60%      | 28.24%              | 23.10%        | 20.91%          | 22.83%      |
| No. of CCCLs                          | 809         | 337                 | 416           | 302             | 456         |
| No. of Observations                   | 13,808      | 13,752              | 13,752        | 13,757          | 13,757      |
| Adjusted $R^2$                        | 0.067       | 0.028               | 0.033         | 0.024           | 0.038       |

*Notes:* This table provides the Shapley decomposition of the adjusted  $R^2$  for model (1) estimated for various subsamples based on different CCCL characteristics. In Panel A, Column (1) reports values from the full sample (corresponding to Table 4 Panel C), and we split the sample according to our manually classified comment categories in Columns (2)-(4), our manually classified issue types in Columns (5)-(8), and whether the firm agrees to change future disclosures in Columns (9)-(10). In Panel B, we again report the full-sample results in Column (1) and then split the sample based on the conference call speaker in Columns (2)-(3) and the conference call segment in Columns (4)-(5). We include the same controls and fixed effects as in Table 4 Panel C. For the various subsamples, we exclude any observations where the same SEC comment letter contains multiple comments that fall into different categories based on our manual classifications.

**Table OA6: CCCL Coefficients for the Remediation and Quality Analyses across CCCL Types (same firm letter-level)**

**Panel A: Comment Categories, Issue Types, and Firm Agreement to Change Disclosures**

| Dependent Variable                                                                                                                                                     | By Comment Category |           |            |              | By Issue Type  |                 |                |            | By Agreement |               |
|------------------------------------------------------------------------------------------------------------------------------------------------------------------------|---------------------|-----------|------------|--------------|----------------|-----------------|----------------|------------|--------------|---------------|
|                                                                                                                                                                        | (1)<br>Full         | (2)<br>1  | (3)<br>3/4 | (4)<br>2a/2b | (5)<br>Revenue | (6)<br>Non-GAAP | (7)<br>Segment | (8)<br>MDA | (9)<br>Agree | (10)<br>Other |
| <i>RefGuidance</i>                                                                                                                                                     | 0.0686**            | 0.0771**  | 0.1526*    | -0.0472      | 0.0662         | 0.2067***       | 0.0214         | 0.1317***  | 0.1377***    | -0.0187       |
| <i>Specificity</i>                                                                                                                                                     | 0.0318              | 0.0138    | -0.0030    | 0.0999       | 0.0716         | 0.0812          | -0.0809        | -0.0244    | 0.0081       | 0.0369        |
| <i>NegativeCount</i>                                                                                                                                                   | 0.1344***           | 0.1432*** | -0.0008    | 0.0673       | 0.1753***      | 0.0266          | -0.0185        | 0.1077*    | 0.1129***    | 0.1063***     |
| <i>DeficientAreas</i>                                                                                                                                                  | 0.1093***           | 0.0650**  | 0.1216     | 0.1690***    | 0.1281*        | 0.0335          | 0.2345***      | -0.0631    | -0.0001      | 0.1617***     |
| <i>DiscChanges</i>                                                                                                                                                     | 0.0747***           | 0.0555*   | 0.0992     | 0.0396       | 0.0725         | 0.1076          | 0.0246         | 0.0323     | 0.1409***    | -0.0324       |
| <i>#AAIIssues</i>                                                                                                                                                      | 1.3772***           | 1.3105*** | 1.5701     | 0.8805       | 0.9906*        | 1.3486**        | 1.0598*        | 1.0522**   | 1.4445***    | 0.8247**      |
| <i>LnConvLength</i>                                                                                                                                                    | 0.2419***           | 0.1370*** | 0.5496***  | 0.5295***    | 0.2012**       | 0.1952**        | 0.5661***      | 0.0001     | 0.0422       | 0.3766***     |
| <i>#Rounds</i>                                                                                                                                                         | 0.3463***           | 0.2261*** | 0.6370***  | 0.6904***    | 0.2877**       | 0.3167**        | 0.7394***      | 0.0276     | 0.0997       | 0.4777***     |
| <b>Statistics for Models with Table 5 Dependent Variables: <i>RefGuidance</i>, <i>Specificity</i>, <i>NegativeCount</i>, <i>DeficientAreas</i>, <i>DiscChanges</i></b> |                     |           |            |              |                |                 |                |            |              |               |
| No. of CCCLs                                                                                                                                                           | 714                 | 547       | 40         | 97           | 96             | 99              | 111            | 149        | 342          | 332           |
| No. of Observations                                                                                                                                                    | 3,013               | 2,983     | 2,983      | 2,983        | 2,975          | 2,975           | 2,975          | 2,975      | 2,973        | 2,973         |
| <b>Statistics for Models with Table 6 Dependent Variables: <i>#AAIIssues</i>, <i>LnConvLength</i>, <i>#Rounds</i></b>                                                  |                     |           |            |              |                |                 |                |            |              |               |
| No. of CCCLs                                                                                                                                                           | 744                 | 569       | 40         | 104          | 101            | 99              | 114            | 159        | 351          | 347           |
| No. of Observations                                                                                                                                                    | 3,222               | 3,191     | 3,191      | 3,191        | 3,183          | 3,183           | 3,183          | 3,183      | 3,176        | 3,176         |

**Table OA6, continued: CCCL Coefficients for the Remediation and Quality Analyses across CCCL Types (same firm letter-level)**

**Panel B: Conference Call Speakers and Segments**

| Dependent Variable                                                                                                                         | By Speaker  |                     | By Segment    |                 |             |
|--------------------------------------------------------------------------------------------------------------------------------------------|-------------|---------------------|---------------|-----------------|-------------|
|                                                                                                                                            | (1)<br>Full | (2)<br>Includes CFO | (3)<br>No CFO | (4)<br>Q&A/Both | (5)<br>Body |
| <i>RefGuidance</i>                                                                                                                         | 0.0686**    | 0.0435              | 0.0525        | 0.0192          | 0.0870**    |
| <i>Specificity</i>                                                                                                                         | 0.0318      | 0.0221              | 0.0220        | -0.0120         | 0.0664*     |
| <i>NegativeCount</i>                                                                                                                       | 0.1344***   | 0.1250***           | 0.0756**      | 0.1090***       | 0.1103***   |
| <i>DeficientAreas</i>                                                                                                                      | 0.1093***   | 0.0885**            | 0.0681*       | 0.0696*         | 0.1017***   |
| <i>DiscChanges</i>                                                                                                                         | 0.0747**    | 0.0411              | 0.0611        | 0.0418          | 0.0779**    |
| <i>#AAIssues</i>                                                                                                                           | 1.3772***   | 1.3087***           | 0.9133**      | 0.9978***       | 1.2921***   |
| <i>LnConvLength</i>                                                                                                                        | 0.2419***   | 0.3135***           | 0.1327***     | 0.1949***       | 0.2336***   |
| <i>#Rounds</i>                                                                                                                             | 0.3463***   | 0.3617***           | 0.2693***     | 0.2595***       | 0.3325***   |
| <b>Statistics for Models with Table 5 Dependent Variables: <i>RefGuidance, Specificity, NegativeCount, DeficientAreas, DiscChanges</i></b> |             |                     |               |                 |             |
| No. of CCCLs                                                                                                                               | 714         | 308                 | 357           | 267             | 402         |
| No. of Observations                                                                                                                        | 3,013       | 2,964               | 2,964         | 2,968           | 2,968       |
| <b>Statistics for Models with Table 6 Dependent Variables: <i>#AAIssues, LnConvLength, #Rounds</i></b>                                     |             |                     |               |                 |             |
| No. of CCCLs                                                                                                                               | 744         | 317                 | 376           | 278             | 420         |
| No. of Observations                                                                                                                        | 3,222       | 3,171               | 3,171         | 3,176           | 3,176       |

*Notes:* This table provides CCCL coefficients from the same-firm letter-level specifications from Table 5 Panel C (dependent variables of *RefGuidance, Specificity, NegativeCount, DeficientAreas, and DiscChanges*) and Table 6 Panel C (dependent variables of *#AAIssues, LnConvLength, and #Rounds*) estimated for various subsamples based on different CCCL characteristics. In Panel A, Column (1) reports values from the full sample (corresponding to Table 5 Panel C and Table 6 Panel C), and we split the sample according to our manually classified comment categories in Columns (2)-(4), our manually classified issue types in Columns (5)-(8), and whether the firm agrees to change future disclosures in Columns (9)-(10). In Panel B, we again report the full-sample results in Column (1) and then split the sample based on the conference call speaker in Columns (2)-(3) and the conference call segment in Columns (4)-(5). We include the same control variables and firm and year-quarter fixed effects as Table 5 Panel C for dependent variables *RefGuidance, Specificity, NegativeCount, DeficientAreas, and DiscChanges*, and the same as Table 6 Panel C for dependent variables *#AAIssues, LnConvLength, and #Rounds*. For the various subsamples, we exclude any observations where the same SEC comment letter contains multiple comments that fall into different categories based on our manual classification.

**Table OA7: Full Tabulation of Table 5 Panel B: Quality of SEC Filing Reviews for Pooled Sample Letter-level Comparison**

|                        | (1)                     |               | (2)                     |               | (3)                       |               | (4)                        |               | (5)                     |               |
|------------------------|-------------------------|---------------|-------------------------|---------------|---------------------------|---------------|----------------------------|---------------|-------------------------|---------------|
|                        | <i>DV = RefGuidance</i> |               | <i>DV = Specificity</i> |               | <i>DV = NegativeCount</i> |               | <i>DV = DeficientAreas</i> |               | <i>DV = DiscChanges</i> |               |
|                        | <i>Coeff</i>            | <i>t-stat</i> | <i>Coeff</i>            | <i>t-stat</i> | <i>Coeff</i>              | <i>t-stat</i> | <i>Coeff</i>               | <i>t-stat</i> | <i>Coeff</i>            | <i>t-stat</i> |
| <i>CCCL</i>            | <b>0.1062***</b>        | <b>(5.06)</b> | <b>0.0574***</b>        | <b>(2.69)</b> | <b>0.1680***</b>          | <b>(7.86)</b> | <b>0.1424***</b>           | <b>(6.73)</b> | <b>0.1220***</b>        | <b>(5.56)</b> |
| <i>LnAge</i>           | -0.0140**               | (-2.01)       | -0.0044                 | (-0.59)       | 0.0093                    | (1.25)        | -0.0025                    | (-0.34)       | -0.0058                 | (-0.76)       |
| <i>LnMVE</i>           | -0.0290***              | (-5.92)       | -0.0163***              | (-3.05)       | 0.0020                    | (0.37)        | 0.0228***                  | (4.44)        | -0.0095*                | (-1.76)       |
| <i>MTB</i>             | -0.0007                 | (-0.76)       | -0.0007                 | (-0.71)       | -0.0039***                | (-3.87)       | -0.0041***                 | (-4.35)       | -0.0022**               | (-2.16)       |
| <i>LitigationRisk</i>  | 0.0522**                | (2.20)        | -0.0614**               | (-2.40)       | 0.0590**                  | (2.33)        | -0.0139                    | (-0.58)       | -0.0182                 | (-0.70)       |
| <i>#Segments</i>       | 0.0002                  | (0.10)        | 0.0018                  | (1.08)        | 0.0059***                 | (3.43)        | 0.0069***                  | (4.15)        | 0.0037**                | (2.18)        |
| <i>Foreign</i>         | 0.0286**                | (2.55)        | 0.0172                  | (1.44)        | -0.0042                   | (-0.35)       | -0.0014                    | (-0.12)       | -0.0076                 | (-0.61)       |
| <i>Advertising</i>     | -0.0000                 | (-1.11)       | 0.0000                  | (0.86)        | -0.0000                   | (-0.79)       | -0.0000                    | (-1.45)       | -0.0000                 | (-0.41)       |
| <i>R&amp;D</i>         | -0.7678**               | (-2.54)       | -0.8964***              | (-2.74)       | -2.0035***                | (-6.14)       | -0.7969**                  | (-2.52)       | -0.5404*                | (-1.69)       |
| <i>ExtFinancing</i>    | 0.0323                  | (0.33)        | 0.2708***               | (2.67)        | 0.0425                    | (0.43)        | 0.0442                     | (0.45)        | 0.1452                  | (1.34)        |
| <i>NYSE</i>            | -0.0025                 | (-0.24)       | 0.0092                  | (0.81)        | 0.0193*                   | (1.68)        | -0.0024                    | (-0.22)       | 0.0140                  | (1.21)        |
| <i>Big4</i>            | -0.0079                 | (-0.29)       | -0.0935***              | (-3.27)       | -0.0126                   | (-0.44)       | 0.0800***                  | (2.87)        | 0.0309                  | (1.06)        |
| <i>SecondTier</i>      | 0.0131                  | (0.42)        | -0.0618*                | (-1.91)       | 0.0240                    | (0.75)        | 0.0410                     | (1.31)        | 0.0354                  | (1.06)        |
| <i>AuditorTenure</i>   | -0.0009                 | (-1.39)       | 0.0001                  | (0.11)        | -0.0011                   | (-1.62)       | -0.0017***                 | (-2.64)       | -0.0018***              | (-2.74)       |
| <i>InstOwn</i>         | -0.0097                 | (-0.49)       | -0.0518**               | (-2.44)       | -0.0353*                  | (-1.65)       | -0.0713***                 | (-3.46)       | -0.0250                 | (-1.14)       |
| <i>LnAnalysts</i>      | -0.0042                 | (-0.66)       | -0.0106                 | (-1.54)       | 0.0015                    | (0.22)        | -0.0042                    | (-0.63)       | -0.0076                 | (-1.07)       |
| <i>Spread</i>          | -2.2285                 | (-1.52)       | -1.6623                 | (-1.10)       | 1.1317                    | (0.75)        | 0.2444                     | (0.17)        | -2.2428                 | (-1.45)       |
| <i>PriorBodyLength</i> | 0.0101                  | (0.86)        | 0.0115                  | (0.88)        | 0.0236*                   | (1.79)        | 0.0522***                  | (4.18)        | 0.0340***               | (2.58)        |
| <i>PriorQALength</i>   | 0.0120                  | (1.04)        | 0.0116                  | (0.94)        | 0.0123                    | (1.01)        | 0.0065                     | (0.55)        | 0.0056                  | (0.45)        |
| <i>Restate</i>         | -0.0323*                | (-1.85)       | 0.0010                  | (0.05)        | 0.0817***                 | (4.29)        | 0.0498***                  | (2.66)        | -0.0210                 | (-1.11)       |

|                             |            |         |            |         |            |         |            |         |            |         |
|-----------------------------|------------|---------|------------|---------|------------|---------|------------|---------|------------|---------|
| <i>ICMW</i>                 | 0.0009     | (0.05)  | 0.0326     | (1.53)  | 0.0802***  | (3.89)  | 0.0398**   | (1.99)  | 0.0098     | (0.46)  |
| <i>AudDismiss</i>           | 0.0203     | (0.80)  | -0.0235    | (-0.85) | -0.0381    | (-1.38) | -0.0518*   | (-1.88) | -0.0381    | (-1.33) |
| <i>AudResign</i>            | 0.0245     | (0.42)  | -0.0135    | (-0.20) | -0.0214    | (-0.36) | -0.1867*** | (-2.95) | -0.1197**  | (-2.09) |
| <i>Volatility</i>           | -0.1868*   | (-1.92) | 0.1185     | (1.13)  | 0.3107***  | (2.90)  | 0.4535***  | (4.52)  | -0.1003    | (-0.91) |
| <i>Loss</i>                 | -0.0164    | (-1.51) | 0.0152     | (1.33)  | 0.0933***  | (8.06)  | 0.0649***  | (5.84)  | -0.0057    | (-0.48) |
| <i>M&amp;A</i>              | 0.0436*    | (1.83)  | 0.0518**   | (1.99)  | 0.0009     | (0.03)  | 0.0503**   | (1.96)  | -0.0039    | (-0.16) |
| <i>Restructuring</i>        | -0.0043    | (-0.08) | -0.0164    | (-0.32) | 0.0677     | (1.12)  | -0.0041    | (-0.08) | 0.0324     | (0.62)  |
| <i>#Filings</i>             | 0.1150***  | (20.11) | 0.1241***  | (22.85) | 0.1135***  | (19.24) | 0.0675***  | (14.25) | 0.0806***  | (14.57) |
| <i>10K</i>                  | 0.2091***  | (13.94) | -0.0594*** | (-3.37) | -0.0060    | (-0.34) | 0.0409**   | (2.42)  | 0.0798***  | (4.56)  |
| <i>LimitedScope</i>         | -0.0912*** | (-8.18) | -0.0413*** | (-3.47) | -0.0433*** | (-3.55) | 0.0068     | (0.59)  | -0.1053*** | (-8.75) |
| <i>Letter<sub>t-1</sub></i> | -0.0248*   | (-1.84) | -0.0299**  | (-2.04) | -0.0037    | (-0.25) | -0.0223    | (-1.59) | -0.0637*** | (-4.34) |
| <i>Letter<sub>t-2</sub></i> | -0.0030    | (-0.26) | 0.0012     | (0.10)  | 0.0070     | (0.58)  | -0.0002    | (-0.02) | -0.0252**  | (-2.05) |
| <i>PastCCUpload</i>         | 0.0030     | (0.17)  | 0.0377**   | (2.00)  | 0.0488***  | (2.60)  | 0.0356**   | (2.01)  | 0.0211     | (1.16)  |
| <i>PastCCCorresp</i>        | -0.0070    | (-0.37) | -0.0174    | (-0.88) | 0.0011     | (0.06)  | 0.0457**   | (2.38)  | -0.0184    | (-0.90) |
| <i>FYR12</i>                | -0.0142    | (-1.00) | 0.0206     | (1.39)  | -0.0122    | (-0.83) | -0.0094    | (-0.66) | -0.0164    | (-1.09) |
| <i>Sept</i>                 | 0.0159     | (0.87)  | 0.0006     | (0.03)  | -0.0172    | (-0.87) | 0.0175     | (0.91)  | 0.0007     | (0.03)  |
| <i>Issued90</i>             | -0.0002    | (-0.02) | -0.0010    | (-0.08) | 0.0006     | (0.05)  | 0.0140     | (1.15)  | 0.0207     | (1.62)  |
| <i>TeamSize</i>             | 0.0700***  | (12.96) | 0.0924***  | (16.28) | 0.0681***  | (12.15) | 0.0576***  | (10.64) | 0.0753***  | (12.94) |
| Year-qtr FE                 | Yes        |         |
| Industry FE                 | Yes        |         |
| No. of Obs.                 | 12,708     |         | 12,708     |         | 12,708     |         | 12,708     |         | 12,708     |         |
| Adjusted R <sup>2</sup>     | 0.293      |         | 0.173      |         | 0.224      |         | 0.112      |         | 0.158      |         |

Notes: This table presents the results of Table 5 Panel B, with all control variables tabulated.

**Table OA8: Full Tabulation of Table 5 Panel C: Quality of SEC Filing Reviews for Same Firm Letter-level Comparison**

|                        | (1)                     |               | (2)                     |               | (3)                       |               | (4)                        |               | (5)                     |               |
|------------------------|-------------------------|---------------|-------------------------|---------------|---------------------------|---------------|----------------------------|---------------|-------------------------|---------------|
|                        | <i>DV = RefGuidance</i> |               | <i>DV = Specificity</i> |               | <i>DV = NegativeCount</i> |               | <i>DV = DeficientAreas</i> |               | <i>DV = DiscChanges</i> |               |
|                        | <i>Coeff</i>            | <i>t-stat</i> | <i>Coeff</i>            | <i>t-stat</i> | <i>Coeff</i>              | <i>t-stat</i> | <i>Coeff</i>               | <i>t-stat</i> | <i>Coeff</i>            | <i>t-stat</i> |
| <i>CCCL</i>            | <b>0.0686**</b>         | <b>(2.49)</b> | <b>0.0318</b>           | <b>(1.10)</b> | <b>0.1344***</b>          | <b>(4.87)</b> | <b>0.1093***</b>           | <b>(4.13)</b> | <b>0.0747***</b>        | <b>(2.64)</b> |
| <i>LnAge</i>           | -0.1476**               | (-2.54)       | 0.0096                  | (0.13)        | 0.1018**                  | (2.02)        | 0.0284                     | (0.46)        | -0.0776                 | (-1.16)       |
| <i>LnMVE</i>           | -0.0157                 | (-0.55)       | -0.0304                 | (-0.95)       | -0.0407                   | (-1.41)       | 0.0064                     | (0.21)        | -0.0104                 | (-0.34)       |
| <i>MTB</i>             | -0.0015                 | (-0.63)       | 0.0006                  | (0.28)        | -0.0026                   | (-1.15)       | -0.0025                    | (-1.25)       | -0.0032                 | (-1.26)       |
| <i>LitigationRisk</i>  | 0.7302***               | (5.91)        | 0.8722***               | (7.31)        | 0.3866**                  | (2.28)        | -0.0067                    | (-0.02)       | 0.6754                  | (1.44)        |
| <i>#Segments</i>       | -0.0028                 | (-0.50)       | 0.0035                  | (0.60)        | -0.0089                   | (-1.40)       | 0.0057                     | (0.99)        | -0.0040                 | (-0.68)       |
| <i>Foreign</i>         | -0.0581                 | (-0.93)       | -0.0967                 | (-1.06)       | -0.0794                   | (-0.91)       | -0.0336                    | (-0.43)       | -0.1087                 | (-1.44)       |
| <i>Advertising</i>     | 0.0001                  | (1.10)        | 0.0000                  | (0.19)        | 0.0000                    | (0.34)        | 0.0002*                    | (1.73)        | 0.0001                  | (1.41)        |
| <i>R&amp;D</i>         | -5.3971**               | (-2.20)       | -3.1656                 | (-1.18)       | -4.1928                   | (-1.63)       | -0.1884                    | (-0.07)       | -3.7393                 | (-1.53)       |
| <i>ExtFinancing</i>    | -0.1486                 | (-0.61)       | -0.3785                 | (-1.64)       | 0.1215                    | (0.48)        | -0.1960                    | (-0.83)       | -0.3361                 | (-1.35)       |
| <i>NYSE</i>            | -0.4177**               | (-2.09)       | 0.0361                  | (0.20)        | 0.4964***                 | (4.16)        | 0.3063*                    | (1.71)        | -0.3977                 | (-1.22)       |
| <i>Big4</i>            | -0.0350                 | (-0.25)       | -0.2194                 | (-1.29)       | -0.3472**                 | (-2.15)       | -0.1217                    | (-0.72)       | -0.1901                 | (-1.06)       |
| <i>SecondTier</i>      | 0.0769                  | (0.52)        | -0.0824                 | (-0.52)       | -0.1558                   | (-0.93)       | -0.0381                    | (-0.21)       | -0.1169                 | (-0.65)       |
| <i>AuditorTenure</i>   | 0.0011                  | (0.30)        | 0.0035                  | (0.71)        | 0.0022                    | (0.58)        | 0.0032                     | (0.85)        | -0.0011                 | (-0.25)       |
| <i>InstOwn</i>         | -0.0014                 | (-0.02)       | -0.0585                 | (-0.59)       | -0.0092                   | (-0.10)       | -0.0170                    | (-0.18)       | -0.0025                 | (-0.03)       |
| <i>LnAnalysts</i>      | 0.0082                  | (0.41)        | -0.0011                 | (-0.05)       | -0.0037                   | (-0.17)       | -0.0002                    | (-0.01)       | 0.0232                  | (1.14)        |
| <i>Spread</i>          | -21.9866*               | (-1.68)       | -19.7648                | (-1.65)       | -6.9719                   | (-0.48)       | 0.9351                     | (0.07)        | -8.6644                 | (-0.70)       |
| <i>PriorBodyLength</i> | 0.0289                  | (0.67)        | 0.1084**                | (1.97)        | 0.1073**                  | (2.13)        | 0.1360***                  | (2.67)        | 0.0957*                 | (1.86)        |
| <i>PriorQALength</i>   | -0.0829*                | (-1.77)       | -0.0289                 | (-0.61)       | 0.0723                    | (1.64)        | -0.0233                    | (-0.49)       | 0.0388                  | (0.81)        |
| <i>Restate</i>         | -0.0431                 | (-1.06)       | 0.0169                  | (0.37)        | 0.1322***                 | (3.08)        | 0.0689*                    | (1.72)        | -0.0111                 | (-0.26)       |

|                             |            |         |           |         |           |         |           |         |           |         |
|-----------------------------|------------|---------|-----------|---------|-----------|---------|-----------|---------|-----------|---------|
| <i>ICMW</i>                 | -0.0099    | (-0.18) | 0.0404    | (0.73)  | 0.0403    | (0.74)  | -0.0164   | (-0.33) | -0.0825   | (-1.51) |
| <i>AudDismiss</i>           | -0.0474    | (-0.64) | 0.0236    | (0.32)  | -0.0312   | (-0.42) | 0.0695    | (0.88)  | -0.0385   | (-0.52) |
| <i>AudResign</i>            | 0.0114     | (0.10)  | 0.1219    | (0.89)  | 0.0606    | (0.41)  | -0.3189   | (-1.62) | -0.0327   | (-0.28) |
| <i>Volatility</i>           | -0.0877    | (-0.27) | -0.2082   | (-0.58) | 0.0888    | (0.25)  | 0.3341    | (1.06)  | -0.0056   | (-0.01) |
| <i>Loss</i>                 | -0.0009    | (-0.03) | -0.0352   | (-1.07) | 0.0775**  | (2.53)  | 0.0171    | (0.57)  | 0.0047    | (0.15)  |
| <i>M&amp;A</i>              | -0.0291    | (-0.58) | -0.0605   | (-1.02) | -0.1117** | (-2.08) | 0.0052    | (0.10)  | -0.0606   | (-1.09) |
| <i>Restructuring</i>        | -0.0919    | (-0.59) | 0.0107    | (0.09)  | -0.1283   | (-0.88) | 0.0737    | (0.56)  | 0.0775    | (0.63)  |
| <i>#Filings</i>             | 0.1123***  | (9.95)  | 0.1143*** | (9.80)  | 0.1214*** | (10.45) | 0.0854*** | (8.75)  | 0.1081*** | (8.22)  |
| <i>10K</i>                  | 0.1054*    | (1.84)  | 0.1639**  | (2.39)  | 0.1368**  | (2.31)  | 0.2444*** | (4.35)  | 0.1209*   | (1.93)  |
| <i>LimitedScope</i>         | -0.1202*** | (-4.65) | -0.0414   | (-1.50) | 0.0600**  | (2.19)  | 0.0750*** | (2.92)  | -0.0343   | (-1.17) |
| <i>Letter<sub>t-1</sub></i> | -0.0519*   | (-1.74) | -0.0267   | (-0.82) | 0.0441    | (1.29)  | 0.0018    | (0.06)  | -0.0410   | (-1.28) |
| <i>Letter<sub>t-2</sub></i> | -0.0440*   | (-1.67) | -0.0286   | (-1.05) | -0.0073   | (-0.26) | 0.0363    | (1.49)  | -0.0350   | (-1.29) |
| <i>PastCCCorresp</i>        | -0.0725    | (-1.15) | 0.0220    | (0.29)  | -0.0606   | (-0.93) | -0.0158   | (-0.25) | 0.0348    | (0.48)  |
| <i>FYR12</i>                | -0.0561    | (-0.41) | 0.0856    | (0.49)  | 0.0182    | (0.13)  | 0.1486    | (0.70)  | 0.0462    | (0.35)  |
| <i>Sept</i>                 | 0.0085     | (0.19)  | -0.0307   | (-0.62) | -0.0145   | (-0.30) | 0.0420    | (0.91)  | -0.0104   | (-0.21) |
| <i>Issued90</i>             | 0.0478     | (1.62)  | 0.0351    | (1.11)  | 0.0173    | (0.57)  | 0.0420    | (1.46)  | 0.0681**  | (2.19)  |
| <i>TeamSize</i>             | 0.0742***  | (6.24)  | 0.0735*** | (5.46)  | 0.0575*** | (4.53)  | 0.0504*** | (4.37)  | 0.0677*** | (5.10)  |
| Year-qr FE                  | Yes        |         | Yes       |         | Yes       |         | Yes       |         | Yes       |         |
| Firm FE                     | Yes        |         | Yes       |         | Yes       |         | Yes       |         | Yes       |         |
| No. of Obs.                 | 3,013      |         | 3,013     |         | 3,013     |         | 3,013     |         | 3,013     |         |
| Adjusted R <sup>2</sup>     | 0.326      |         | 0.172     |         | 0.272     |         | 0.185     |         | 0.222     |         |

*Notes:* This table presents the results of Table 5 Panel C, with all control variables tabulated. *AudResign* and *Restructuring* are omitted as their values are consistently zero across the sample.

**Table OA9: Full Tabulation of Table 6 Panel B: Costs of Remediation for Pooled Sample Letter-level Comparison**

|                        | (1)                    |               | (2)                      |               | (3)                 |               |
|------------------------|------------------------|---------------|--------------------------|---------------|---------------------|---------------|
|                        | <i>DV = #AAIIssues</i> |               | <i>DV = LnConvLength</i> |               | <i>DV = #Rounds</i> |               |
|                        | <i>Coeff</i>           | <i>t-stat</i> | <i>Coeff</i>             | <i>t-stat</i> | <i>Coeff</i>        | <i>t-stat</i> |
| <b>CCCL</b>            | <b>1.7880***</b>       | <b>(9.15)</b> | <b>0.2335***</b>         | <b>(8.38)</b> | <b>0.3436***</b>    | <b>(8.05)</b> |
| <i>LnAge</i>           | -0.0932                | (-1.35)       | 0.0092                   | (0.94)        | 0.0044              | (0.38)        |
| <i>LnMVE</i>           | 0.0685                 | (1.35)        | 0.0580***                | (8.19)        | 0.0486***           | (5.74)        |
| <i>MTB</i>             | -0.0200**              | (-2.17)       | -0.0025*                 | (-1.85)       | -0.0034**           | (-2.16)       |
| <i>LitigationRisk</i>  | 0.2170                 | (0.87)        | 0.0304                   | (0.91)        | 0.0806**            | (2.21)        |
| <i>#Segments</i>       | 0.0338**               | (2.19)        | 0.0024                   | (1.07)        | 0.0078***           | (2.80)        |
| <i>Foreign</i>         | 0.5425***              | (4.88)        | 0.0338**                 | (2.10)        | 0.0413**            | (2.20)        |
| <i>Advertising</i>     | -0.0003                | (-1.43)       | 0.0000                   | (1.04)        | 0.0000              | (1.05)        |
| <i>R&amp;D</i>         | -18.2907***            | (-6.42)       | -0.1757                  | (-0.42)       | -0.6037             | (-1.22)       |
| <i>ExtFinancing</i>    | 1.6822*                | (1.74)        | -0.1597                  | (-1.18)       | -0.0928             | (-0.61)       |
| <i>NYSE</i>            | 0.0798                 | (0.76)        | 0.0090                   | (0.60)        | 0.0225              | (1.29)        |
| <i>Big4</i>            | -0.5492**              | (-2.06)       | 0.0023                   | (0.06)        | -0.0660             | (-1.48)       |
| <i>SecondTier</i>      | -0.2270                | (-0.75)       | -0.0052                  | (-0.12)       | -0.0438             | (-0.87)       |
| <i>AuditorTenure</i>   | -0.0113*               | (-1.89)       | -0.0014                  | (-1.64)       | -0.0007             | (-0.65)       |
| <i>InstOwn</i>         | -0.7819***             | (-4.04)       | -0.1074***               | (-3.68)       | -0.0925***          | (-2.83)       |
| <i>LnAnalysts</i>      | -0.2013***             | (-3.21)       | 0.0014                   | (0.14)        | 0.0113              | (1.02)        |
| <i>Spread</i>          | -4.4472                | (-0.32)       | 0.9163                   | (0.48)        | -1.1223             | (-0.51)       |
| <i>PriorBodyLength</i> | 0.0034                 | (0.03)        | 0.0067                   | (0.39)        | -0.0044             | (-0.22)       |
| <i>PriorQALength</i>   | 0.1837                 | (1.60)        | -0.0150                  | (-0.95)       | -0.0207             | (-1.08)       |
| <i>Restate</i>         | 0.1672                 | (0.92)        | -0.1060***               | (-3.84)       | -0.0969***          | (-3.30)       |
| <i>ICMW</i>            | 0.2735                 | (1.35)        | 0.0389                   | (1.37)        | -0.0025             | (-0.08)       |

|                             |            |         |            |         |           |         |
|-----------------------------|------------|---------|------------|---------|-----------|---------|
| <i>AudDismiss</i>           | -0.7212*** | (-2.81) | -0.1084*** | (-2.72) | -0.0561   | (-1.37) |
| <i>AudResign</i>            | -1.2955**  | (-2.46) | -0.2600**  | (-2.37) | 0.1548    | (1.01)  |
| <i>Volatility</i>           | 0.7034     | (0.69)  | 0.2132     | (1.57)  | 0.5540*** | (3.25)  |
| <i>Loss</i>                 | 0.4268***  | (3.99)  | 0.0691***  | (4.55)  | 0.0522*** | (2.92)  |
| <i>M&amp;A</i>              | 0.3562     | (1.64)  | 0.0350     | (1.06)  | 0.0084    | (0.21)  |
| <i>Restructuring</i>        | 0.1106     | (0.18)  | 0.0148     | (0.21)  | 0.0201    | (0.23)  |
| <i>#Filings</i>             | 1.8373***  | (24.31) | 0.1067***  | (13.76) | 0.2062*** | (15.43) |
| <i>10K</i>                  | 1.0771***  | (6.69)  | 0.0569**   | (2.11)  | 0.0631**  | (2.22)  |
| <i>LimitedScope</i>         | -0.6096*** | (-5.51) | 0.1349***  | (8.03)  | 0.1048*** | (5.58)  |
| <i>Letter<sub>t-1</sub></i> | -0.6499*** | (-4.92) | -0.0690*** | (-3.30) | -0.0054   | (-0.23) |
| <i>Letter<sub>t-2</sub></i> | -0.2978*** | (-2.76) | 0.0055     | (0.36)  | -0.0007   | (-0.04) |
| <i>PastCCUpload</i>         | -0.0909    | (-0.57) | 0.0648***  | (2.66)  | 0.0347    | (1.24)  |
| <i>PastCCCorresp</i>        | -0.2370    | (-1.42) | 0.0237     | (0.86)  | 0.0496    | (1.50)  |
| <i>FYR12</i>                | -0.1199    | (-0.83) | -0.0114    | (-0.56) | 0.0125    | (0.51)  |
| <i>Sept</i>                 | 0.0591     | (0.33)  | 0.0333     | (1.26)  | -0.0184   | (-0.62) |
| <i>Issued90</i>             | 0.3306***  | (2.91)  | -0.0227    | (-1.34) | 0.0393**  | (2.10)  |
| <i>TeamSize</i>             | 1.3092***  | (24.64) | 0.0800***  | (10.45) | 0.0184**  | (2.02)  |
| <i>##AAIssues</i>           |            |         | 0.0288***  | (21.14) | 0.0272*** | (15.05) |
| Year-qtr FE                 | Yes        |         | Yes        |         | Yes       |         |
| Industry FE                 | Yes        |         | Yes        |         | Yes       |         |
| No. of Obs.                 | 13,808     |         | 13,808     |         | 13,808    |         |
| Adjusted R <sup>2</sup>     | 0.408      |         | 0.219      |         | 0.184     |         |

Notes: This table presents the results of Table 6 Panel B, with all control variables tabulated.

**Table OA10: Full Tabulation of Table 6 Panel C: Costs of Remediation for Same Firm Letter-level Comparison**

|                        | (1)                   |               | (2)                      |               | (3)                 |               |
|------------------------|-----------------------|---------------|--------------------------|---------------|---------------------|---------------|
|                        | <i>DV = #AAIssues</i> |               | <i>DV = LnConvLength</i> |               | <i>DV = #Rounds</i> |               |
|                        | <i>Coeff</i>          | <i>t-stat</i> | <i>Coeff</i>             | <i>t-stat</i> | <i>Coeff</i>        | <i>t-stat</i> |
| <i>CCCL</i>            | <b>1.3772***</b>      | <b>(5.31)</b> | <b>0.2419***</b>         | <b>(7.22)</b> | <b>0.3463***</b>    | <b>(7.04)</b> |
| <i>LnAge</i>           | -0.5988               | (-0.98)       | 0.1207                   | (1.41)        | 0.3262***           | (2.89)        |
| <i>LnMVE</i>           | -0.2356               | (-0.83)       | 0.0011                   | (0.03)        | -0.0473             | (-0.94)       |
| <i>MTB</i>             | 0.0043                | (0.19)        | -0.0008                  | (-0.26)       | -0.0061             | (-1.39)       |
| <i>LitigationRisk</i>  | 10.8730***            | (4.08)        | -0.7789***               | (-3.40)       | -0.0783             | (-0.56)       |
| <i>#Segments</i>       | -0.0589               | (-0.92)       | 0.0120                   | (1.58)        | 0.0139              | (1.22)        |
| <i>Foreign</i>         | -0.7532               | (-1.05)       | 0.0428                   | (0.43)        | 0.0359              | (0.28)        |
| <i>Advertising</i>     | 0.0011*               | (1.76)        | 0.0001                   | (0.43)        | 0.0001              | (0.86)        |
| <i>R&amp;D</i>         | -61.0336***           | (-2.78)       | 0.9278                   | (0.31)        | 2.2840              | (0.55)        |
| <i>ExtFinancing</i>    | -1.2769               | (-0.51)       | 0.0131                   | (0.04)        | -0.4163             | (-1.09)       |
| <i>NYSE</i>            | 1.8129                | (0.55)        | 0.1451                   | (0.30)        | 0.5993              | (1.20)        |
| <i>Big4</i>            | -1.4217               | (-0.91)       | -0.1727                  | (-1.06)       | -0.2358             | (-1.33)       |
| <i>SecondTier</i>      | -1.3630               | (-0.91)       | -0.1128                  | (-0.74)       | -0.1231             | (-0.72)       |
| <i>AuditorTenure</i>   | 0.0144                | (0.28)        | 0.0003                   | (0.07)        | -0.0025             | (-0.52)       |
| <i>InstOwn</i>         | -0.4847               | (-0.55)       | 0.3900***                | (3.21)        | 0.2720*             | (1.76)        |
| <i>LnAnalysts</i>      | 0.1748                | (0.88)        | 0.0184                   | (0.71)        | 0.0491              | (1.31)        |
| <i>Spread</i>          | -188.8347             | (-1.51)       | 4.8180                   | (0.31)        | -11.1134            | (-0.68)       |
| <i>PriorBodyLength</i> | -0.1060               | (-0.21)       | 0.0154                   | (0.26)        | -0.0963             | (-1.28)       |
| <i>PriorQALength</i>   | -0.3256               | (-0.72)       | 0.0361                   | (0.59)        | 0.0048              | (0.06)        |
| <i>Restate</i>         | 0.7006                | (1.58)        | -0.0598                  | (-1.05)       | -0.0377             | (-0.51)       |
| <i>ICMW</i>            | -0.3613               | (-0.58)       | -0.0451                  | (-0.61)       | 0.0039              | (0.04)        |

|                             |           |         |           |         |           |         |
|-----------------------------|-----------|---------|-----------|---------|-----------|---------|
| <i>AudDismiss</i>           | 0.2819    | (0.41)  | 0.0072    | (0.07)  | -0.1448   | (-1.23) |
| <i>AudResign</i>            | 1.0511    | (0.77)  | 0.1215    | (0.64)  | 0.6468*** | (2.89)  |
| <i>Volatility</i>           | 1.7828    | (0.51)  | -0.6548   | (-1.62) | -0.8893   | (-1.62) |
| <i>Loss</i>                 | 0.1634    | (0.53)  | 0.0321    | (0.84)  | 0.0970*   | (1.91)  |
| <i>M&amp;A</i>              | -0.3538   | (-0.68) | 0.0053    | (0.08)  | -0.0539   | (-0.61) |
| <i>Restructuring</i>        | 1.0968    | (0.54)  | 0.0917    | (0.71)  | 0.0602    | (0.33)  |
| <i>#Filings</i>             | 1.6724*** | (10.48) | 0.1441*** | (6.86)  | 0.2866*** | (9.75)  |
| <i>10K</i>                  | 3.0866*** | (4.88)  | 0.6080*** | (5.95)  | 0.5425*** | (4.86)  |
| <i>LimitedScope</i>         | -0.4151   | (-1.63) | 0.0628*   | (1.78)  | 0.1052**  | (2.28)  |
| <i>Letter<sub>t-1</sub></i> | -0.7945** | (-2.56) | -0.0167   | (-0.42) | -0.0205   | (-0.38) |
| <i>Letter<sub>t-2</sub></i> | -0.5280** | (-2.12) | 0.0443    | (1.32)  | 0.0113    | (0.26)  |
| <i>PastCCCorresp</i>        | -0.8043   | (-1.21) | -0.1237   | (-1.56) | -0.1094   | (-0.83) |
| <i>FYR12</i>                | 1.0114    | (0.61)  | 0.0698    | (0.46)  | -0.0991   | (-0.50) |
| <i>Sept</i>                 | -0.4652   | (-1.11) | 0.0439    | (0.75)  | -0.0358   | (-0.45) |
| <i>Issued90</i>             | 0.5001    | (1.61)  | 0.0751*   | (1.89)  | 0.1441**  | (2.34)  |
| <i>TeamSize</i>             | 1.2265*** | (10.10) | 0.0187    | (1.25)  | -0.0160   | (-0.71) |
| <i>##AAIssues</i>           |           |         | 0.0224*** | (7.96)  | 0.0144*** | (3.57)  |
| Year-qtr FE                 |           | Yes     |           | Yes     |           | Yes     |
| Firm FE                     |           | Yes     |           | Yes     |           | Yes     |
| No. of Obs.                 |           | 3,222   |           | 3,222   |           | 3,222   |
| Adjusted R <sup>2</sup>     |           | 0.400   |           | 0.287   |           | 0.228   |

*Notes:* This table presents the results of Table 6 Panel C, with all control variables tabulated. *AudResign* and *Restructuring* are omitted as their values are consistently zero across the sample.
